# Supplementary material
Source: publisher figshare collection journal article supplement (https://acs.figshare.com/ndownloader/files/4018921)
Supplement: Supplementary file 1 [file 4018921]

Supporting information

**Reactivity of U<sup>3+</sup> Metallocene Allyl Complexes Leads to a Nanometer-Sized  
Uranium Carbonate, [(C<sub>5</sub>Me<sub>5</sub>)<sub>2</sub>U]<sub>6</sub>(μ-κ<sup>1</sup>:κ<sup>2</sup>-CO<sub>3</sub>)<sub>6</sub>**

Christopher L. Webster, Joseph W. Ziller, and William J. Evans\*

<sup>†</sup>Department of Chemistry, University of California, Irvine, California 92697-2025

email: [wevans@uci.edu](mailto:wevans@uci.edu)

---

**X-ray Data Collection, Structure Solution and Refinement for (η<sup>5</sup>-C<sub>5</sub>Me<sub>5</sub>)(η<sup>8</sup>-  
C<sub>8</sub>H<sub>8</sub>)U[η<sup>3</sup>-CH<sub>2</sub>C(Me)CH<sub>2</sub>], 6.**

A brown crystal of approximate dimensions 0.04 x 0.25 x 0.44 mm was mounted on a glass fiber and transferred to a Bruker SMART APEX II diffractometer. The APEX2<sup>1</sup> program package was used to determine the unit-cell parameters and for data collection (25 sec/frame scan time for a sphere of diffraction data). The raw frame data was processed using SAINT<sup>2</sup> and SADABS<sup>3</sup> to yield the reflection data file. Subsequent calculations were carried out using the SHELXTL<sup>4</sup> program. There were no systematic absences nor any diffraction symmetry other than the Friedel condition. The centrosymmetric triclinic space group  $P\bar{1}$  was assigned and later determined to be correct.

The structure was solved by direct methods and refined on F<sup>2</sup> by full-matrix least-squares techniques. The analytical scattering factors<sup>5</sup> for neutral atoms were used throughout the analysis. Hydrogen atoms were located from a difference-Fourier map and refined (x,y,z and U<sub>iso</sub>).

At convergence, wR2 = 0.0395 and Goof = 1.020 for 655 variables refined against 9062 data (0.74 Å), R1 = 0.0178 for those 7753 data with I > 2.0σ(I).

**Table S2. Crystal data and structure refinement for  $(\eta^5\text{-C}_5\text{Me}_5)(\eta^8\text{-C}_8\text{H}_8)\text{U}[\eta^3\text{-CH}_2\text{C}(\text{Me})\text{CH}_2]$ , 6.**

|                        |                                   |     |
|------------------------|-----------------------------------|-----|
| Identification code    | clw53 (Chris Webster)             |     |
| Empirical formula      | C <sub>22</sub> H <sub>30</sub> U |     |
| Formula weight         | 532.49                            |     |
| Temperature            | 83(2) K                           |     |
| Wavelength             | 0.71073 Å                         |     |
| Crystal system         | Triclinic                         |     |
| Space group            | $P\bar{1}$                        |     |
| Unit cell dimensions   | a = 8.8131(4) Å                   | α = |
|                        | 106.6569(5)°.                     |     |
|                        | b = 14.2385(6) Å                  | β = |
|                        | 98.8404(5)°.                      |     |
|                        | c = 16.0147(6) Å                  | γ = |
|                        | 90.4651(5)°.                      |     |
| Volume                 | 1899.52(14) Å <sup>3</sup>        |     |
| Z                      | 4                                 |     |
| Density (calculated)   | 1.862 Mg/m <sup>3</sup>           |     |
| Absorption coefficient | 8.544 mm <sup>-1</sup>            |     |
| F(000)                 | 1016                              |     |
| Crystal color          | brown                             |     |

|                                         |                                                               |
|-----------------------------------------|---------------------------------------------------------------|
| Crystal size                            | 0.44 x 0.25 x 0.04 mm <sup>3</sup>                            |
| Theta range for data collection         | 1.69 to 28.77°                                                |
| Index ranges                            | -11 ≤ <i>h</i> ≤ 11, -18 ≤ <i>k</i> ≤ 19, -21 ≤ <i>l</i> ≤ 21 |
| Reflections collected                   | 22727                                                         |
| Independent reflections                 | 9062 [R(int) = 0.0198]                                        |
| Completeness to theta = 25.50°          | 99.7 %                                                        |
| Absorption correction                   | Numerical                                                     |
| Max. and min. transmission              | 0.7542 and 0.1173                                             |
| Refinement method                       | Full-matrix least-squares on F <sup>2</sup>                   |
| Data / restraints / parameters          | 9062 / 0 / 655                                                |
| Goodness-of-fit on F <sup>2</sup>       | 1.020                                                         |
| Final R indices [I > 2σ(I) = 7753 data] | R1 = 0.0178, wR2 = 0.0375                                     |
| R indices (all data, 0.74Å)             | R1 = 0.0257, wR2 = 0.0396                                     |
| Largest diff. peak and hole             | 1.217 and -0.840 e.Å <sup>-3</sup>                            |

---

**X-ray Data Collection, Structure Solution and Refinement for  $\{[(C_5Me_5)_2U](\mu-\kappa^1:\kappa^2-CO_3)\}_6$ , 7.**

An orange crystal of approximate dimensions 0.136 x 0.218 x 0.373 mm was mounted on a glass fiber and transferred to a Bruker SMART APEX II diffractometer. The APEX2<sup>1</sup> program package was used to determine the unit-cell parameters and for data collection (35 sec/frame scan time for a sphere of diffraction data). The raw frame data was processed using SAINT<sup>2</sup> and SADABS<sup>3</sup> to yield the reflection data file. Subsequent calculations were carried out using the SHELXTL<sup>4</sup> program. Thee

systematic absences were consistent with the trigonal space groups  $R3$  and  $R\bar{3}$ . The centrosymmetric space group  $R\bar{3}$  was assigned and later determined to be correct.

The structure was solved by direct methods and refined on  $F^2$  by full-matrix least-squares techniques<sup>5</sup>. The analytical scattering factors<sup>6</sup> for neutral atoms were used throughout the analysis. Hydrogen atoms were included using a riding model. There was one molecule of benzene solvent present. The molecule and solvent were located about sites of  $\bar{3}$  symmetry.

At convergence,  $wR2 = 0.0818$  and  $Goof = 1.096$  for 245 variables refined against 3759 data ( $0.83\text{\AA}$ ),  $R1 = 0.0292$  for those 3355 data with  $I > 2.0\sigma(I)$ .

**Table S4. Crystal data and structure refinement for  $\{[(C_5Me_5)_2U](\mu-\kappa^1:\kappa^2-CO_3)\}_6$ , 7.**

|                      |                                           |                        |
|----------------------|-------------------------------------------|------------------------|
| Identification code  | clw40 (Chris Webster)                     |                        |
| Empirical formula    | $C_{126} H_{180} O_{18} U_6 \cdot C_6H_6$ |                        |
| Formula weight       | 3488.98                                   |                        |
| Temperature          | 143(2) K                                  |                        |
| Wavelength           | 0.71073 $\text{\AA}$                      |                        |
| Crystal system       | Trigonal                                  |                        |
| Space group          | $R\bar{3}$                                |                        |
| Unit cell dimensions | $a = 31.339(2) \text{\AA}$                | $\alpha = 90^\circ$ .  |
|                      | $b = 31.339(2) \text{\AA}$                | $\beta = 90^\circ$ .   |
|                      | $c = 10.9920(8) \text{\AA}$               | $\gamma = 120^\circ$ . |
| Volume               | $9349.4(15) \text{\AA}^3$                 |                        |

|                                                                                                                                                                                                                                                      |                                             |
|------------------------------------------------------------------------------------------------------------------------------------------------------------------------------------------------------------------------------------------------------|---------------------------------------------|
| Z                                                                                                                                                                                                                                                    | 3                                           |
| Density (calculated)                                                                                                                                                                                                                                 | 1.859 Mg/m <sup>3</sup>                     |
| Absorption coefficient                                                                                                                                                                                                                               | 7.830 mm <sup>-1</sup>                      |
| F(000)                                                                                                                                                                                                                                               | 5022                                        |
| Crystal color                                                                                                                                                                                                                                        | orange                                      |
| Crystal size                                                                                                                                                                                                                                         | 0.373 x 0.218 x 0.136 mm <sup>3</sup>       |
| Theta range for data collection                                                                                                                                                                                                                      | 1.999 to 25.249°                            |
| Index ranges                                                                                                                                                                                                                                         | -37 ≤ h ≤ 37, -37 ≤ k ≤ 37, -13 ≤ l ≤ 13    |
| Reflections collected                                                                                                                                                                                                                                | 30788                                       |
| Independent reflections                                                                                                                                                                                                                              | 3759 [R(int) = 0.0278]                      |
| Completeness to theta = 25.242°                                                                                                                                                                                                                      | 99.9 %                                      |
| Absorption correction                                                                                                                                                                                                                                | Semi-empirical from equivalents             |
| Max. and min. transmission                                                                                                                                                                                                                           | 0.2791 and 0.1612                           |
| Refinement method                                                                                                                                                                                                                                    | Full-matrix least-squares on F <sup>2</sup> |
| Data / restraints / parameters                                                                                                                                                                                                                       | 3759 / 0 / 245                              |
| Goodness-of-fit on F <sup>2</sup>                                                                                                                                                                                                                    | 1.096                                       |
| Final R indices [I > 2σ(I) = 3355 data]                                                                                                                                                                                                              | R1 = 0.0292, wR2 = 0.0765                   |
| R indices (all data, 0.83 Å)                                                                                                                                                                                                                         | R1 = 0.0346, wR2 = 0.0818                   |
| Largest diff. peak and hole                                                                                                                                                                                                                          | 4.202 and -0.609 e.Å <sup>-3</sup>          |
| X-ray Data Collection, Structure Solution and Refinement for [(C <sub>5</sub> Me <sub>5</sub> ) <sub>2</sub> U] <sub>2</sub> (μ-κ <sup>1</sup> :κ <sup>1</sup> -O,O'-O <sub>2</sub> CCH <sub>2</sub> CH=CH <sub>2</sub> ) <sub>2</sub> , <b>10</b> . |                                             |

A green crystal of approximate dimensions 0.20 x 0.24 x 0.31 mm was mounted on a glass fiber and transferred to a Bruker SMART APEX II diffractometer. The APEX2<sup>1</sup> program package was used to determine the unit-cell parameters and for data

collection (10 sec/frame scan time for a sphere of diffraction data). The raw frame data was processed using SAINT<sup>2</sup> and SADABS<sup>3</sup> to yield the reflection data file. Subsequent calculations were carried out using the SHELXTL<sup>4</sup> program. The diffraction symmetry was  $2/m$  and the systematic absences were consistent with the monoclinic space group  $P2_1/n$  that was later determined to be correct.

The structure was solved by direct methods and refined on  $F^2$  by full-matrix least-squares techniques<sup>5</sup>. The analytical scattering factors<sup>6</sup> for neutral atoms were used throughout the analysis. Hydrogen atoms were included using a riding model. The molecule was located about an inversion center.

At convergence,  $wR2 = 0.0332$  and  $Goof = 1.097$  for 254 variables refined against 5542 data ( $0.74\text{\AA}$ ),  $R1 = 0.0145$  for those 5271 data with  $I > 2.0\sigma(I)$ .

**Table S3. Crystal data and structure refinement for  $[(C_5Me_5)_2U]_2(\mu-\kappa^1:\kappa^1-O,O'-O_2CCH_2CH=CH_2)_2$ , 10.**

|                      |                             |                       |
|----------------------|-----------------------------|-----------------------|
| Identification code  | clw44 (Chris Webster)       |                       |
| Empirical formula    | $C_{48} H_{70} O_4 U_2$     |                       |
| Formula weight       | 1187.10                     |                       |
| Temperature          | 83(2) K                     |                       |
| Wavelength           | 0.71073 $\text{\AA}$        |                       |
| Crystal system       | Monoclinic                  |                       |
| Space group          | $P2_1/n$                    |                       |
| Unit cell dimensions | $a = 9.7800(5) \text{\AA}$  | $\alpha = 90^\circ$ . |
|                      | $b = 15.6266(9) \text{\AA}$ | $\beta =$             |

102.8544(6)°.

$c = 15.0373(8) \text{ \AA}$        $\gamma = 90^\circ$ .

|                                             |                                                              |
|---------------------------------------------|--------------------------------------------------------------|
| Volume                                      | 2240.5(2) $\text{\AA}^3$                                     |
| Z                                           | 2                                                            |
| Density (calculated)                        | 1.760 $\text{Mg/m}^3$                                        |
| Absorption coefficient                      | 7.260 $\text{mm}^{-1}$                                       |
| F(000)                                      | 1148                                                         |
| Crystal color                               | green                                                        |
| Crystal size                                | 0.309 x 0.240 x 0.200 $\text{mm}^3$                          |
| Theta range for data collection             | 1.905 to 28.864°                                             |
| Index ranges                                | $-13 \leq h \leq 13, -20 \leq k \leq 21, -20 \leq l \leq 19$ |
| Reflections collected                       | 26491                                                        |
| Independent reflections                     | 5542 [R(int) = 0.0159]                                       |
| Completeness to theta = 25.242°             | 100.0 %                                                      |
| Absorption correction                       | Numerical                                                    |
| Max. and min. transmission                  | 0.3900 and 0.2249                                            |
| Refinement method                           | Full-matrix least-squares on F <sup>2</sup>                  |
| Data / restraints / parameters              | 5542 / 0 / 254                                               |
| Goodness-of-fit on F <sup>2</sup>           | 1.097                                                        |
| Final R indices [I > 2sigma(I) = 5271 data] | R1 = 0.0145, wR2 = 0.0328                                    |
| R indices (all data, 0.74 $\text{\AA}$ )    | R1 = 0.0159, wR2 = 0.0332                                    |
| Largest diff. peak and hole                 | 0.589 and -0.563 $\text{e.\AA}^{-3}$                         |

---

## References.

1. APEX2 Version 2011.4-1, Bruker AXS, Inc.; Madison, WI 2011.
2. SAINT Version 7.68a, Bruker AXS, Inc.; Madison, WI 2008.
3. Sheldrick, G. M. SADABS, Version 2008/1, Bruker AXS, Inc.; Madison, WI 2008.
4. Sheldrick, G. M. SHELXTL, Version 2008/4, Bruker AXS, Inc.; Madison, WI 2008.
5. Sheldrick, G. M. Shelxl-2012/9
6. International Tables for X-Ray Crystallography 1992, Vol. C., Dordrecht: Kluwer Academic Publishers.
